# Supplementary material for: Performance enhancement of perovskite solar cells with a modified TiO2 electron transport layer using Zn-based additives
Source: Royal Society of Chemistry journal article supplement (doi:10.1039/c6ra01149g), 2016-01-01
Supplement: c6ra01149g1.pdf [file c6ra01149g1.pdf]

## Supporting Information

### Performance enhancement of perovskite solar cells with the modified TiO<sub>2</sub> electron transport layer using Zn-based additives

Minghang Lv, Wei Lv, Xiang Fang, Peng Sun, Bencai Lin, Shuai Zhang, Xueqing Xu, Jianning

Ding\* and Ningyi Yuan\*

Table S1: EDX parameters for normalized atomic percentage of none-doped TiO<sub>2</sub> and 0.02ZTP based ETL films.

|                             | O     | C     | Si    | Na   | Ca   | Mg   | Ti   | Al   | Zn   |
|-----------------------------|-------|-------|-------|------|------|------|------|------|------|
| None-doped TiO <sub>2</sub> | 65.17 | 13.98 | 11.49 | 5.59 | 1.64 | 0.96 | 0.98 | 0.19 |      |
| 0.02ZTP                     | 61.97 | 14.08 | 13.43 | 6.53 | 1.76 | 1.18 | 0.60 | 0.32 | 0.14 |

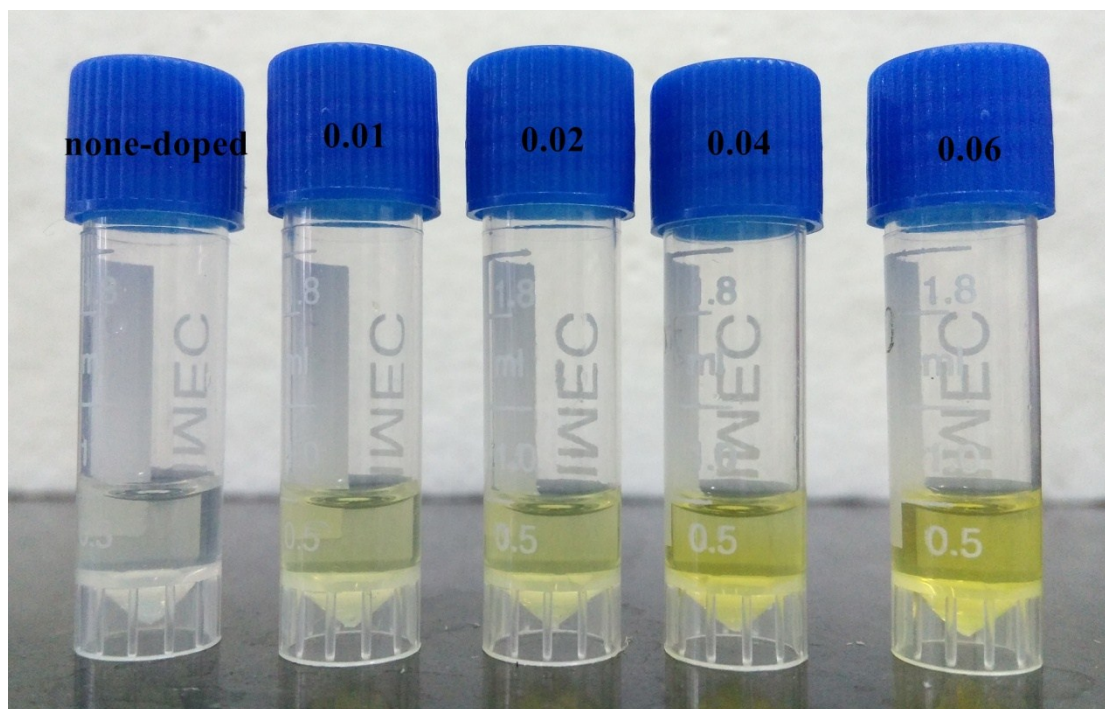

Figure S1. The Zn-Ti precursor solution photos of ETL at an increasing volume ratio of 0, 0.01, 0.02, 0.04, 0.06.

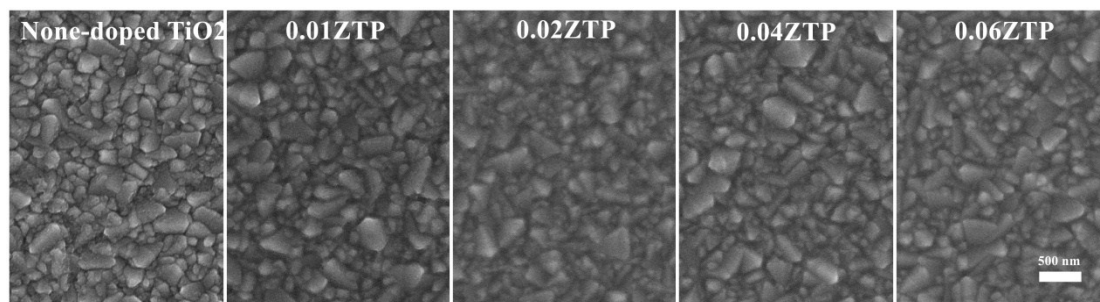

Figure S2. The SEM images of none-doped  $\text{TiO}_2$ , 0.01ZTP, 0.02ZTP, 0.04ZTP and 0.06ZTP based ETL films.

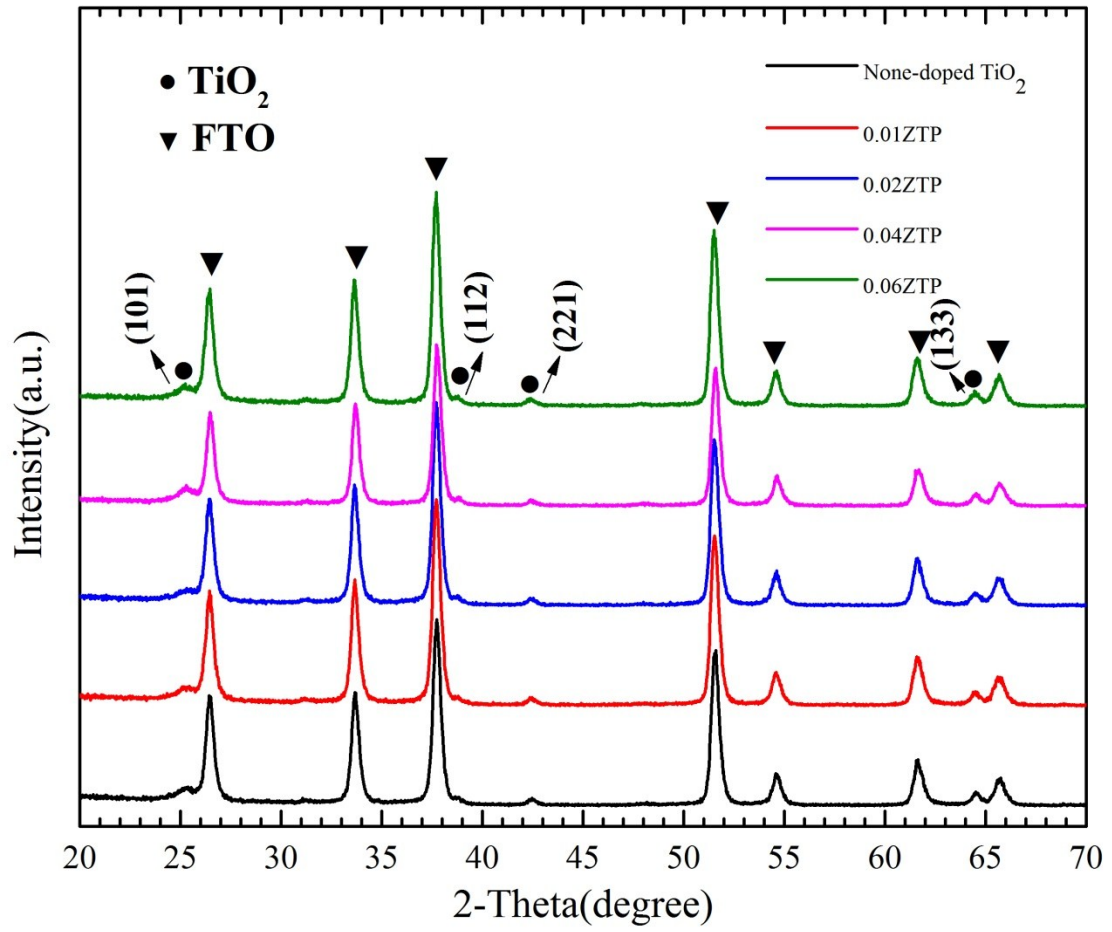

Figure S3. The XRD patterns of none-doped TiO<sub>2</sub>, 0.01ZTP, 0.02ZTP, 0.04ZTP and 0.06ZTP based ETL films.

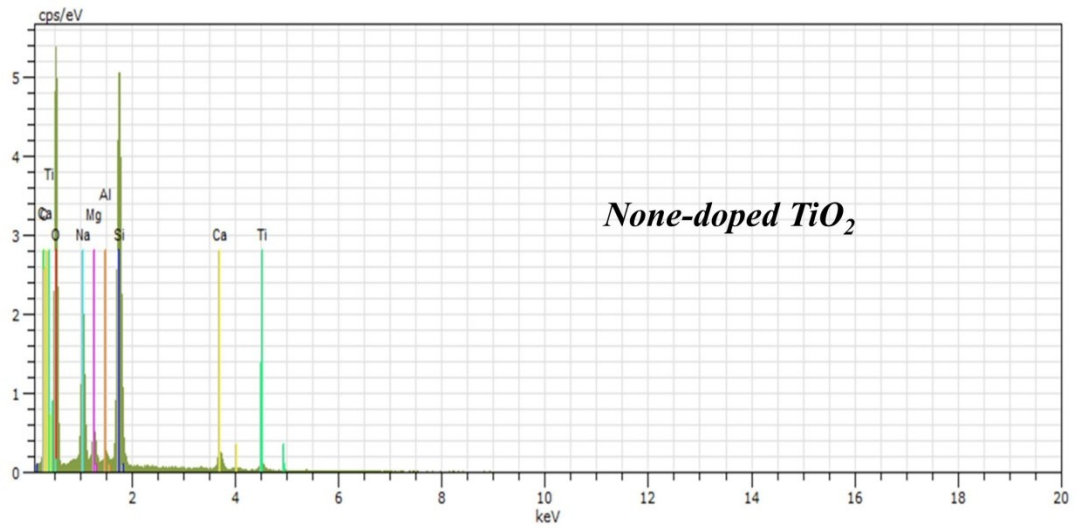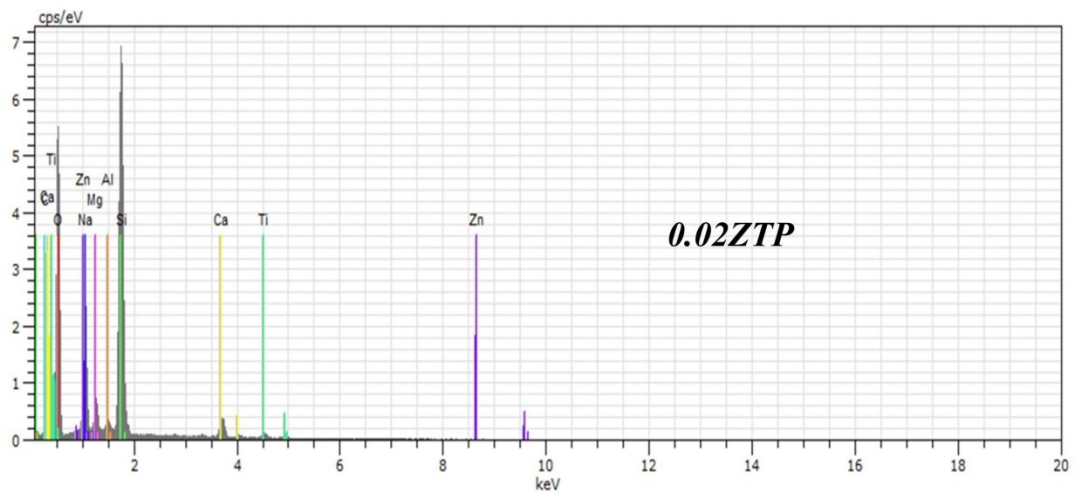

Figure S4. SEM-EDX spectrum for none-doped TiO<sub>2</sub> and 0.02ZTP compact layer on FTO glass.

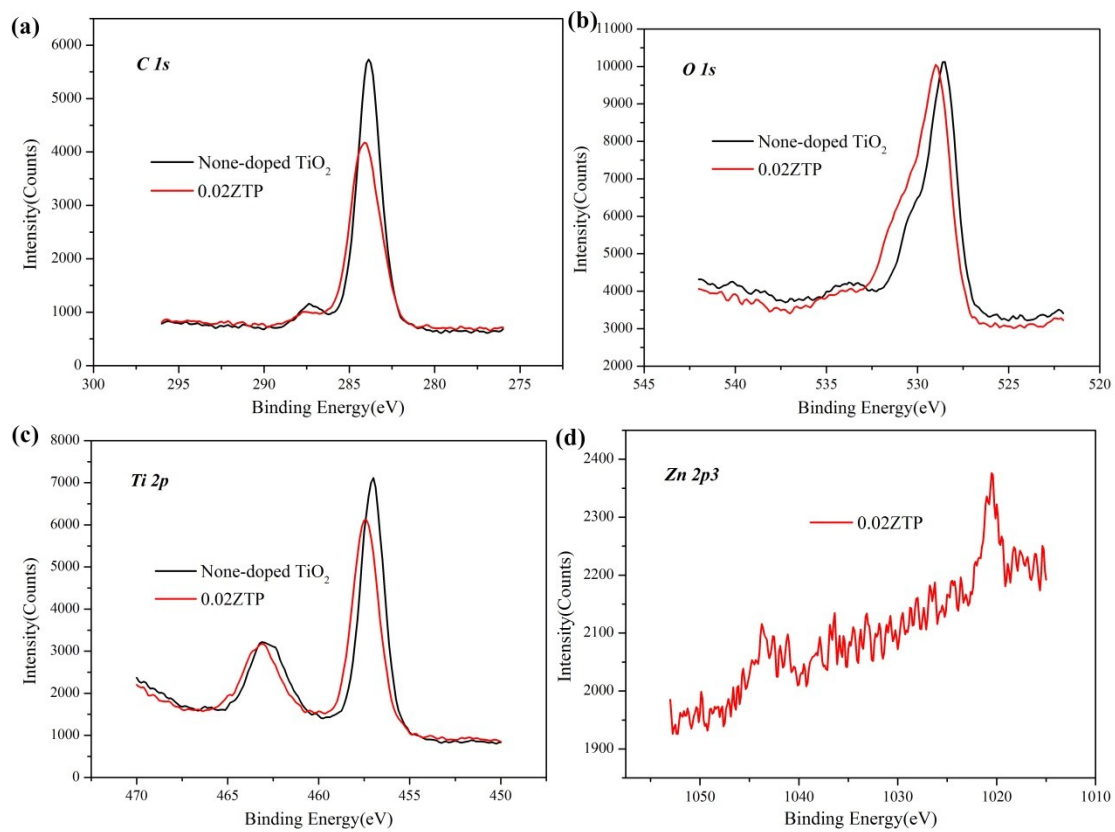

Figure S5. XPS spectra of none-doped  $\text{TiO}_2$  and 0.02ZTP compact film: (a) C 1s, (b) O 1s, (c) Ti 2p, and (d) Zn 2p3.

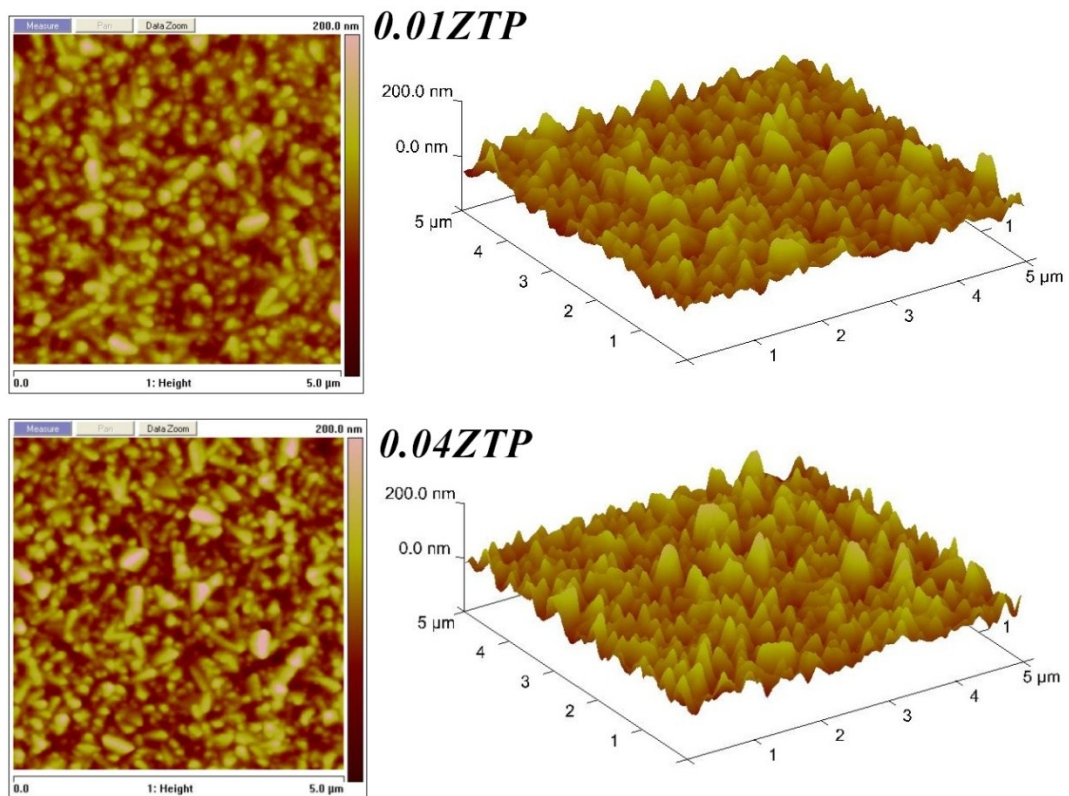

Figure S6. The atomic force microscopy (AFM) images of 0.01ZTP and 0.04ZTP based ETL films.

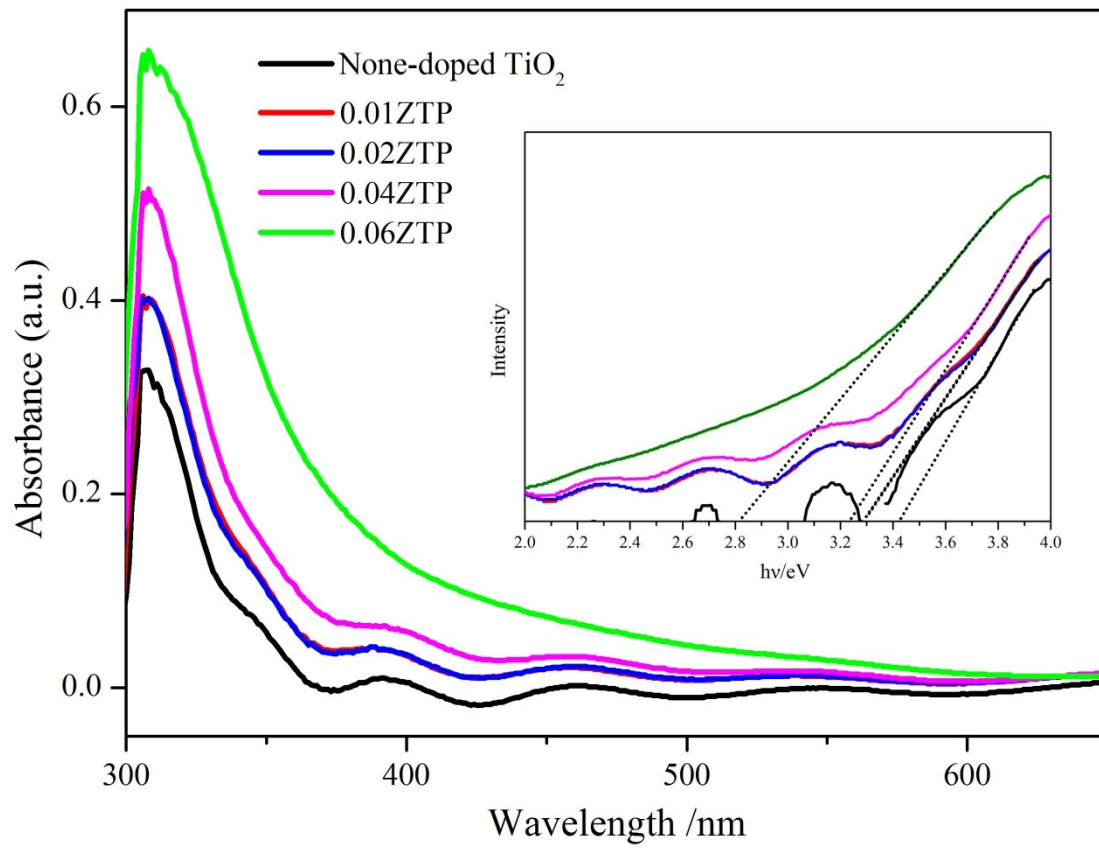

Figure S7. Absorption spectra of the none-doped TiO<sub>2</sub>, 0.01ZTP, 0.02ZTP, 0.04ZTP and 0.06ZTP based ETL films.



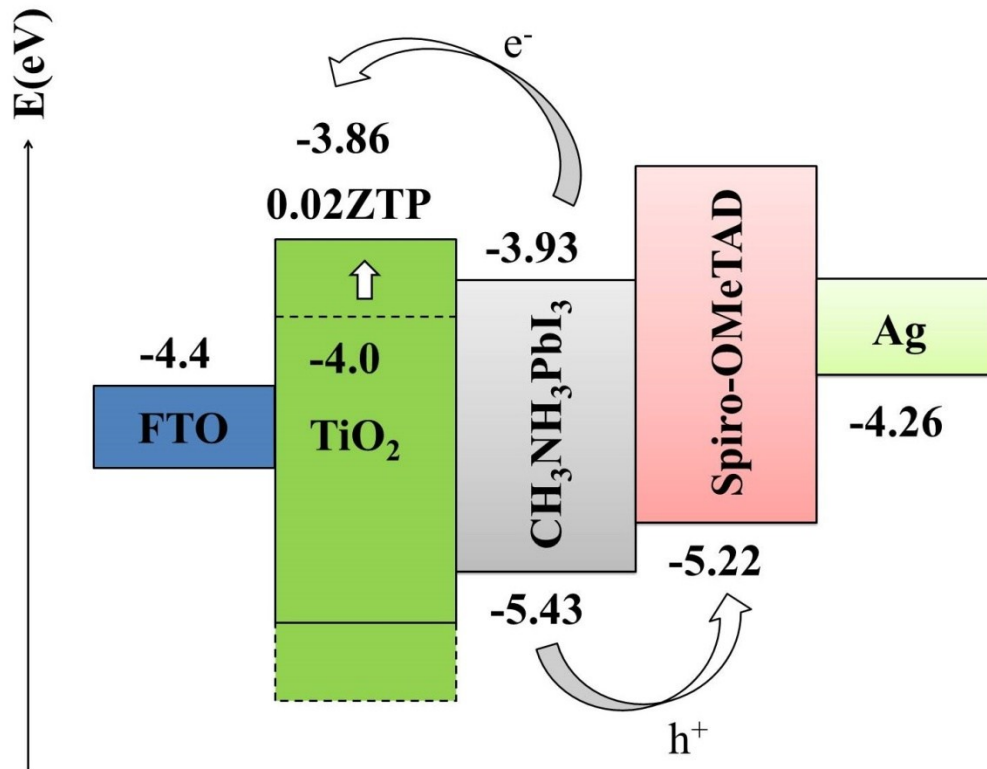

Figure S8. Energy level diagram of perovskite solar cells with none-doped TiO<sub>2</sub> and 0.02ZTP based ETL films.

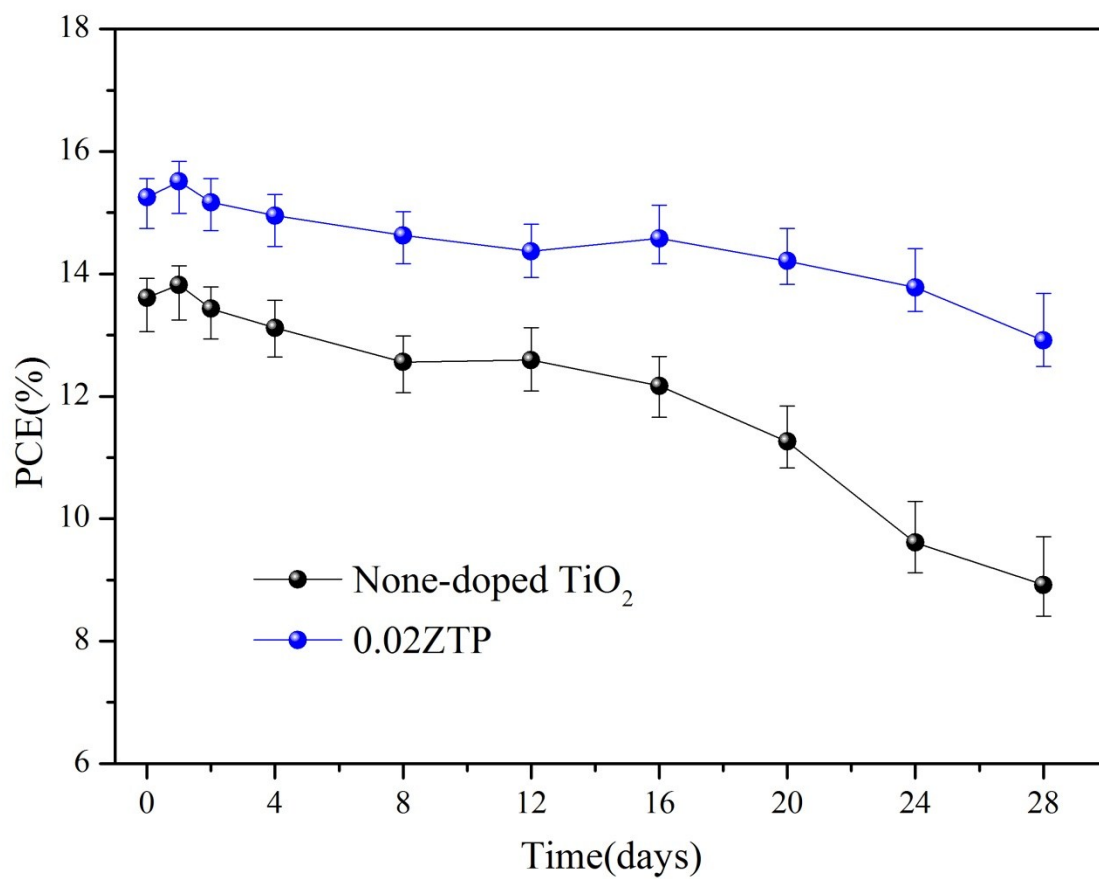

Figure S9. Long-term stability of PVSCs under a 35% humidity
